# Supplementary material
Source: publisher figshare collection journal article supplement (https://springernature.figshare.com/ndownloader/files/20088758)
Supplement: Supplementary file [file 20088758]

**Population size shapes the type of nucleotide variations in humans**

**Sankar Subramanian**

**Supplementary material**

## Supplementary Fig legends

**Figure S1.** Correlation between effective population size ( $N_e$ ) and the ratio AT→GC to GC→AT ( $\beta$ ) estimated for homozygous SNVs from whole genomes of the 1000 Genomes Project. The relationship was highly significant ( $P < 10^{-6}$ ).

**Figure S2.** Relationship between the effective population size ( $N_e$ ) and the ratio of nucleotide changes within the same types ( $\beta$ ): **(A)** within strong types i.e. C→G/G→C **(B)** within weak types i.e. A→T/T→A. The ratios were estimated using the high frequency SNVs (DAF > 0.9) belonging to 27 populations obtained from the 1000 genome Project.

**Figure S3.** Relationship between the effective population size ( $N_e$ ) and the ratio of nucleotide changes within the same types ( $\beta$ ): **(A)** within strong types i.e. C→G/G→C **(B)** within weak types i.e. A→T/T→A. The ratios were estimated using the homozygous SNVs belonging to 126 populations obtained from the Simon Genome Project.

**Figure S4.** Relationship between the effective population size ( $N_e$ ) and the normalized ratio of AT→GC to GC→AT ( $\beta'$ ) changes using equation 2 (see methods). We used A↔T and G↔C to normalize AT→GC and GC→AT changes respectively. **(A)** High frequency SNVs (DAF>0.9) and **(B)** Homozygous SNVs of the 1000 genome project **(C)** Homozygous SNVs from the Simons Genome Diversity project. The relationships were highly significant ( $P < 10^{-6}$ ).

**Figure S5.** The relationship between effective population size ( $N_e$ ) and the normalized ratio AT→GC/GC→AT ( $\beta$ ) estimated for homozygous SNVs present in individual genomes

belonging to 126 distinct populations of the world. This is very similar to Fig 4A except that the nucleotide diversities of non-Africans were 5% reduced while calculating  $N_e$  in order to neutralize the difference in mutation accumulation rates between Africans and non-Africans as reported recently. The correlation was highly significant ( $P < 10^{-6}$ ).

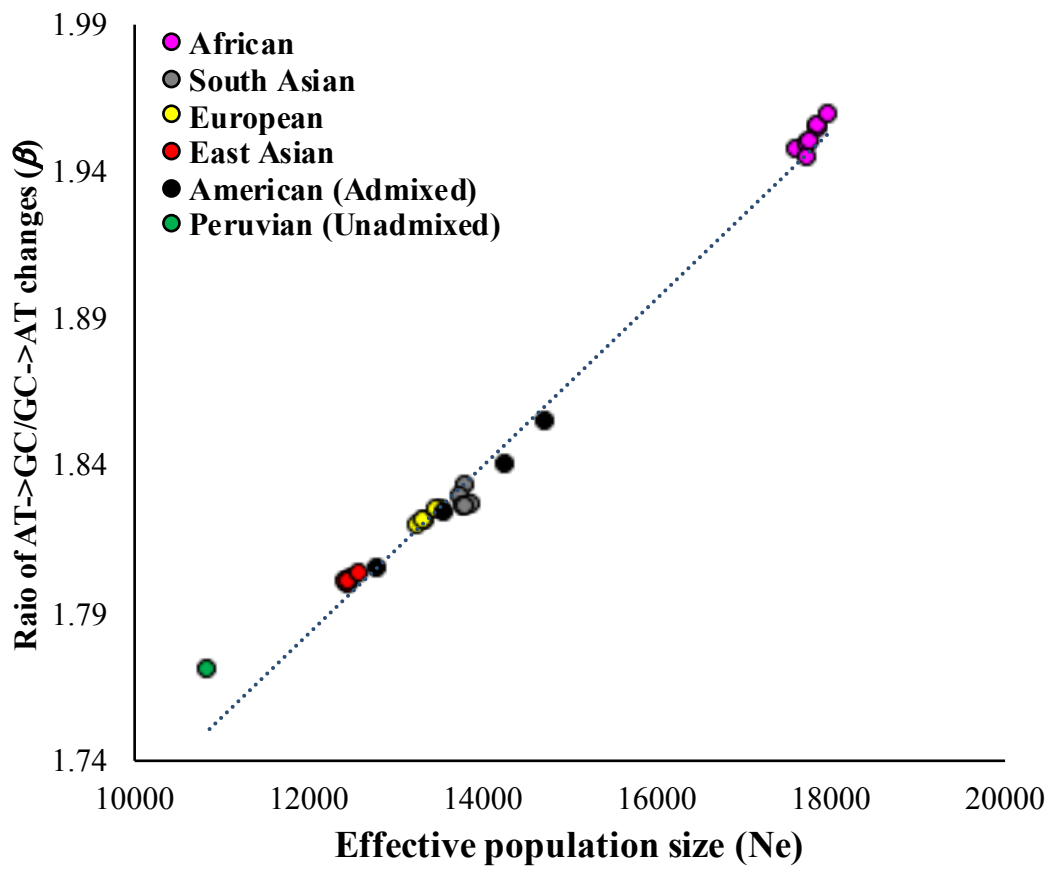

Figure S1

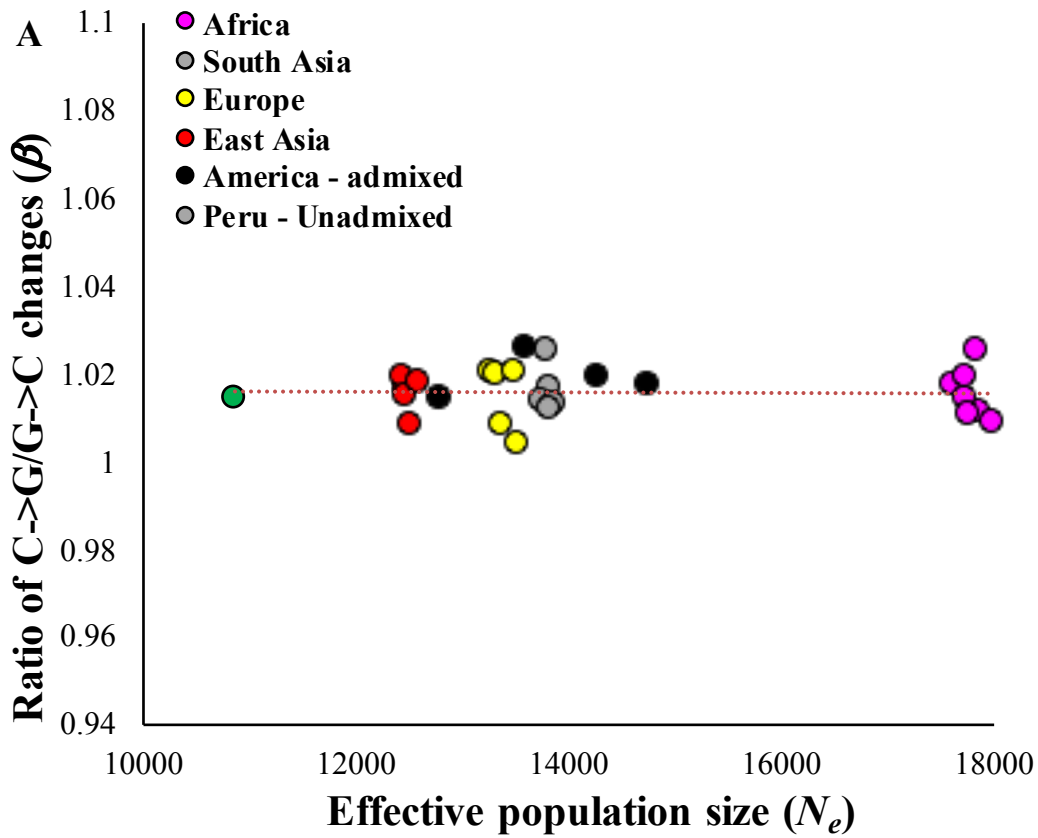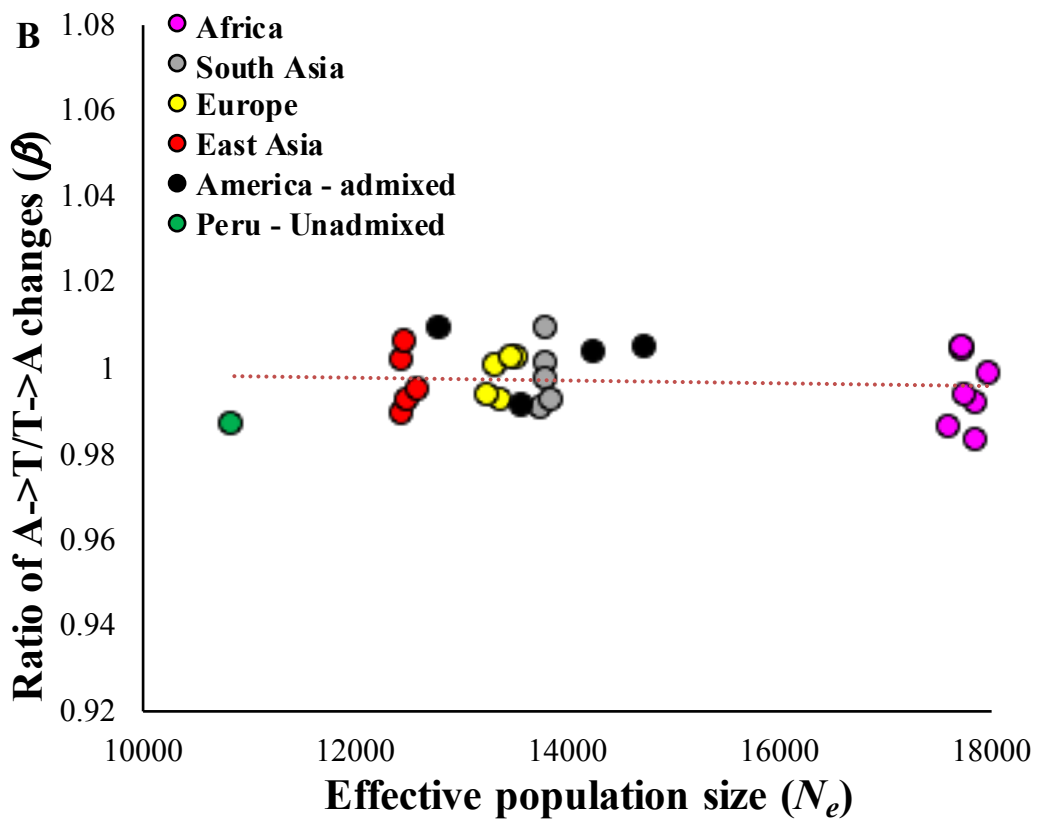

Figure S2

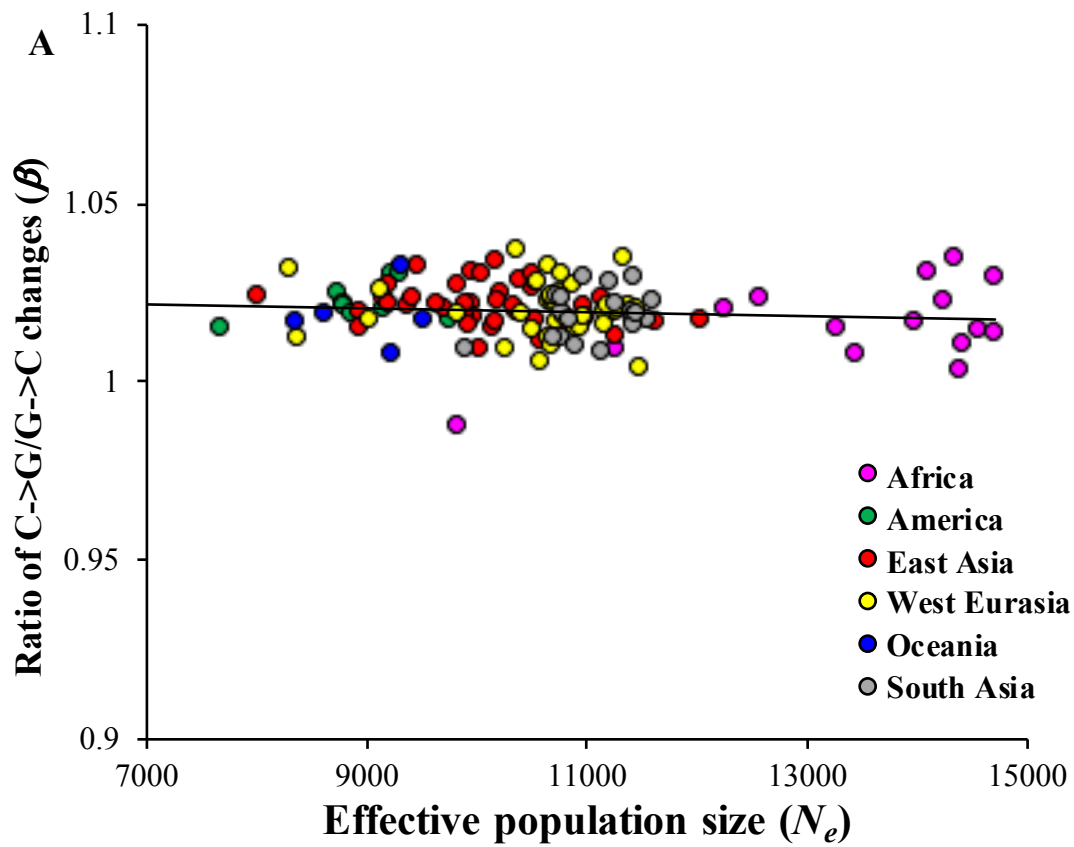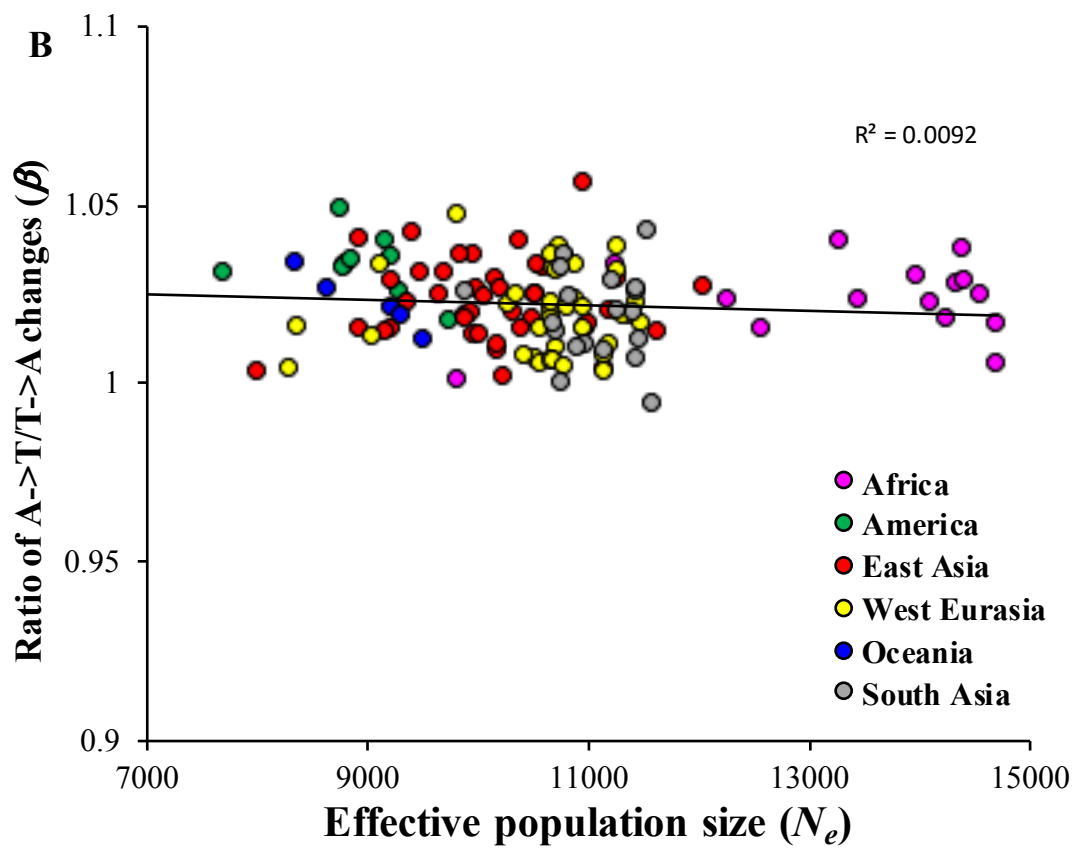

Figure S3

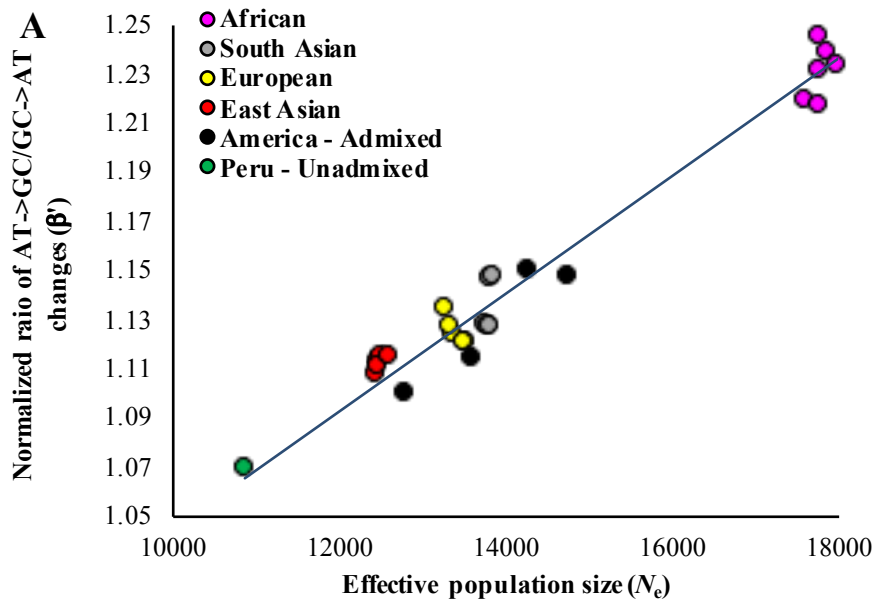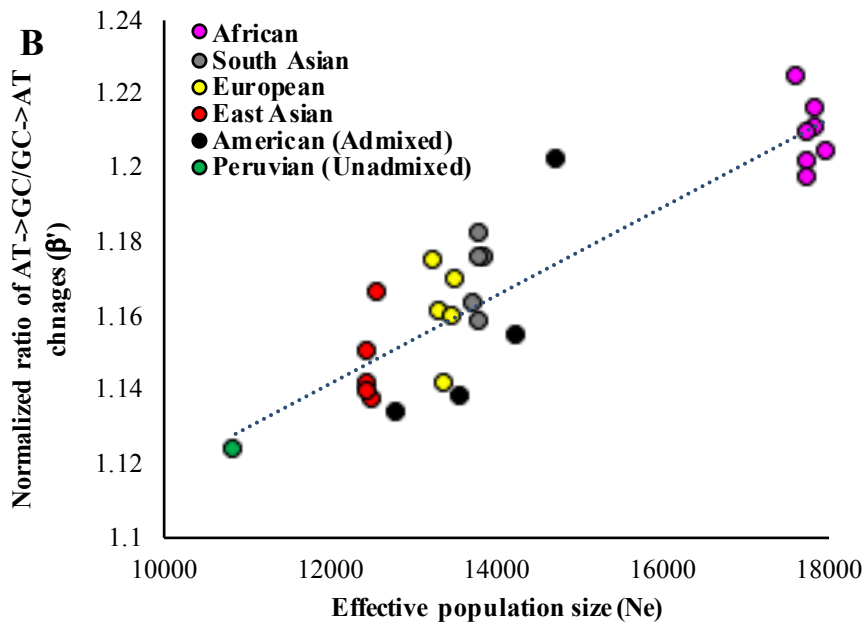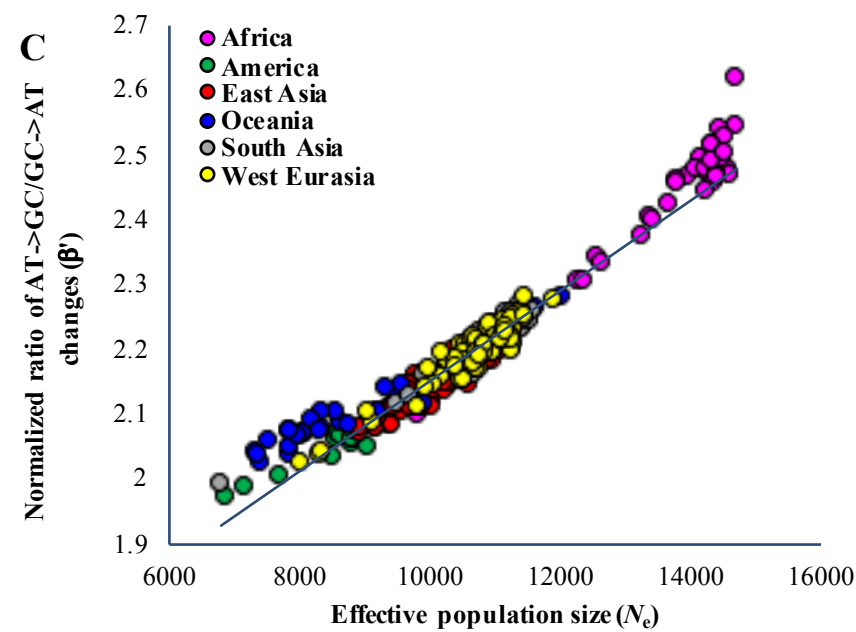

Figure S4

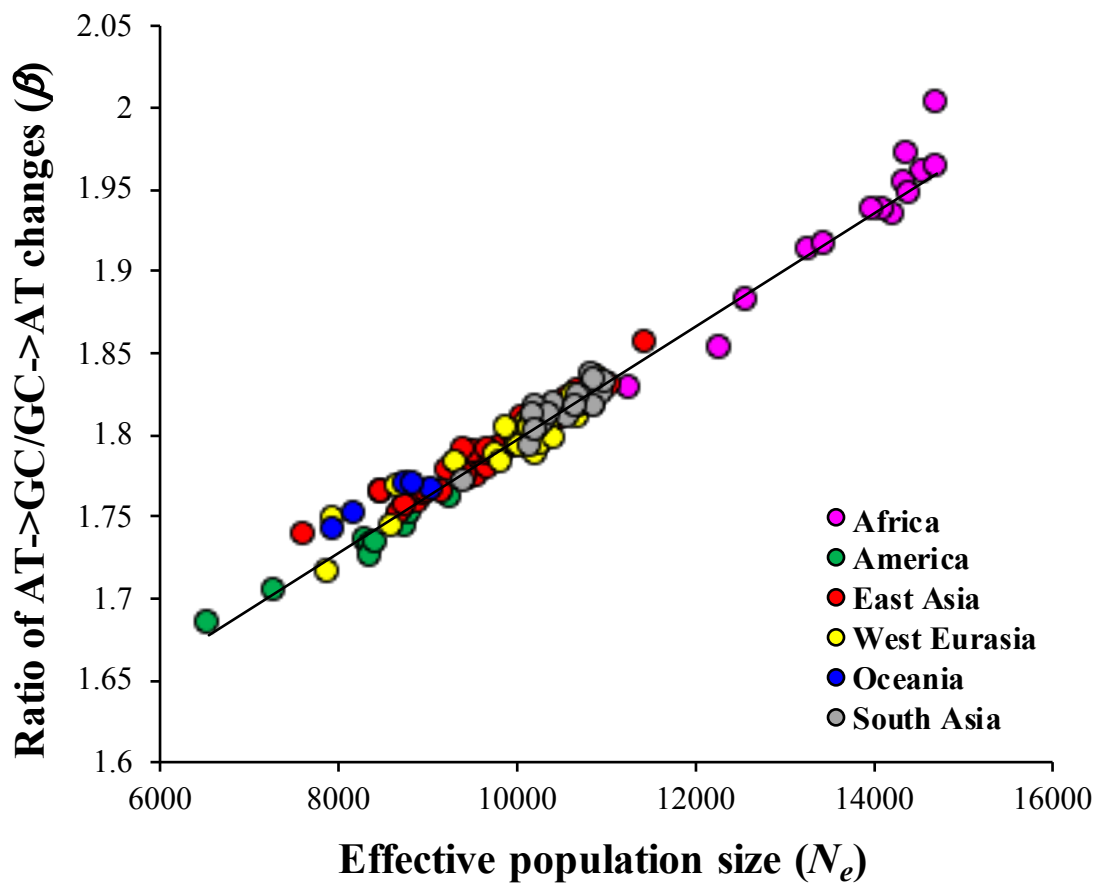

Figure S5
